# Supplementary material for: Neuropeptide F regulates courtship in Drosophila through a male-specific neuronal circuit
Source: eLife journal article supplement (doi:10.7554/elife.49574), 2019-08-12
Supplement: supp [file elife-49574-supp-v1.zip]

Archive with 47 entries (47 files):
- elife_poa_e49574_Video_1.mov
- elife_poa_e49574_Figure_7_source_data_1.xlsx
- elife_poa_e49574_Figure_1_figure_supplement_2.pdf
- elife_poa_e49574_Figure_1_figure_supplement_1_source_data_3.xlsx
- elife_poa_e49574_Figure_8_source_data_2.docx
- elife_poa_e49574_Figure_1_figure_supplement_2_source_data_1.xlsx
- elife_poa_e49574_Figure_5_figure_supplement_1.pdf
- elife_poa_e49574_Supplementary_file_2.docx
- elife_poa_e49574_Figure_4_source_data_5.xlsx
- elife_poa_e49574_Figure_4_source_data_3.xlsx
- elife_poa_e49574_Figure_4_source_data_2.docx
- elife_poa_e49574_Figure_8_source_data_3.zip
- elife_poa_e49574_Figure_7_source_data_4.docx
- elife_poa_e49574_Figure_7_figure_supplement_1.pdf
- elife_poa_e49574_Figure_1_figure_supplement_1_source_data_2.docx
- elife_poa_e49574_Figure_5_figure_supplement_2.pdf
- elife_poa_e49574_Supplementary_file_1.docx
- elife_poa_e49574_Figure_6_source_data_3.xlsx
- elife_poa_e49574_Figure_1_figure_supplement_1_source_data_1.xlsx
- elife_poa_e49574_Figure_1_figure_supplement_1.pdf
- elife_poa_e49574_Figure_7_source_data_3.xlsx
- elife_poa_e49574_Figure_1_source_data_3.xlsx
- elife_poa_e49574_Figure_1_source_data_1.xlsx
- elife_poa_e49574_Figure_5_source_data_1.zip
- elife_poa_e49574_Figure_6_source_data_4.docx
- elife_poa_e49574_Video_2.mov
- elife_poa_e49574_Video_3.mov
- elife_poa_e49574_Figure_1_figure_supplement_3.pdf
- elife_poa_e49574_Figure_1_figure_supplement_1_source_data_4.docx
- elife_poa_e49574_Figure_1_source_data_2.docx
- elife_poa_e49574_Figure_5_figure_supplement_3.pdf
- elife_poa_e49574_Figure_1_figure_supplement_2_source_data_4.docx
- elife_poa_e49574_Figure_4_source_data_1.xlsx
- elife_poa_e49574_Figure_4_source_data_6.docx
- elife_poa_e49574_Figure_6_figure_supplement_1.pdf
- elife_poa_e49574_Figure_4_source_data_4.docx
- elife_poa_e49574_Figure_6_source_data_1.xlsx
- elife_poa_e49574_Figure_1_figure_supplement_2_source_data_2.docx
- elife_poa_e49574_Video_5.mov
- elife_poa_e49574_Figure_1_source_data_4.docx
- elife_poa_e49574_Figure_1_figure_supplement_2_source_data_3.xlsx
- elife_poa_e49574_Figure_7_source_data_2.docx
- elife_poa_e49574_Figure_6_source_data_2.docx
- elife_poa_e49574_Figure_2_figure_supplement_1.pdf
- elife_poa_e49574_Figure_8_source_data_1.xlsx
- elife_poa_e49574_Video_4.mov
- elife_poa_e49574_Transparent_Reporting_File.docx
