# Supplementary material for: Neuropeptide F regulates courtship in Drosophila through a male-specific neuronal circuit
Source: eLife journal article supplement (doi:10.7554/elife.49574), 2019-08-12
Supplement: supp [file elife-49574-supp-v1.zip › elife_poa_e49574_Figure_1_figure_supplement_1_source_data_1.xlsx]

## Sheet: Sheet1
UAS-Kir/npfG4	UAS-DTI/npfG4	npfG4/+	UAS-Kir2.1/+	UAS-DTI/+	UAS-NaChBac/+	UAS-NaChBac/npfG4	UAS-npf/+	UAS-npf/npfG4
0.31	0.27	0	0.06	0.09	0	0.12	0	0
0.38	0.28	0	0.05	0.05	0	0.05	0	0
0.22	0.4	0	0	0	0	0.08	0	0
0.25	0.1	0	0.1	0	0	0.04	0	0
0.33	0.23	0	0.08	0	0	0	0	0
0.15	0.17	0	0.03	0.03	0	0	0	0
0.26	0.2	0.1	0	0	0.05	0	0	0.27
0.2	0.33	0.17	0	0	0.07	0	0	0
0.25	0.1	0.05	0	0	0.23	0	0	0
0.08	0.11	0.03	0	0	0	0	0	0
0.34	0.22	0	0.13	0.09	0	0	0.05	0
0.15	0.3	0	0	0	0	0	0.07	0
