# Supplementary material for: Neuropeptide F regulates courtship in Drosophila through a male-specific neuronal circuit
Source: eLife journal article supplement (doi:10.7554/elife.49574), 2019-08-12
Supplement: supp [file elife-49574-supp-v1.zip › elife_poa_e49574_Figure_1_figure_supplement_1_source_data_3.xlsx]

## Sheet: Sheet1
npfG4/+	UAS-Kir2.1/+	UAS-Kir2.1/npfG4	UAS-DTI/+	UAS-DTI/npfG4	UAS-NaChBac/+	UAS-NaChBac/npfG4	UAS-npf/+	UAS-npf/npfG4
5	3	0	5	1	13	30	5	35
3	7	0	7	0	0	25	16	46
9	15	0	16	0	0	27	3	27
11	9	0	1	0	0	29	4	31
7	4	0	0	0	0	35	7	23
5	1	0	0	0	9	37	10	18
3	1	0	2	0	7	41	0	19
17	0	0	4	0	5	25	0	16
6	8	0	6	0	10	13	0	34
9	12	0	0	0	0	11	7	35
11		0	6	0	0	19	0	46
4		1	7	0	0	7	0	39
