# Supplementary material for: Neuropeptide F regulates courtship in Drosophila through a male-specific neuronal circuit
Source: eLife journal article supplement (doi:10.7554/elife.49574), 2019-08-12
Supplement: supp [file elife-49574-supp-v1.zip › elife_poa_e49574_Figure_1_figure_supplement_2_source_data_1.xlsx]

## Sheet: Sheet1
w+;w1118	npf[LexA]	w+;npf[1]
0	0.81	0.12
0	0.48	0.08
0	0	0
0.28	0.02	0.25
0.42	0.05	0
0	0.52	0.32
0	0	0.25
0	0.78	0
0.08	0	0.09
0	0.43	0.9
0	0	0.73
0	0	0
0.23	0.35	0
0.13	0.55	0.41
0	0.57	0.55
0	0	0.22
0.72	0.9	0.07
0	0	0.33
0	0.21	0
0	0	0.02
0.38	0.74	0.55
0.21	0.33	0.67
0	0.78	0.85
0	0.05	0
