# Supplementary material for: Neuropeptide F regulates courtship in Drosophila through a male-specific neuronal circuit
Source: eLife journal article supplement (doi:10.7554/elife.49574), 2019-08-12
Supplement: supp [file elife-49574-supp-v1.zip › elife_poa_e49574_Figure_1_figure_supplement_2_source_data_3.xlsx]

## Sheet: Sheet1
w+;w1118	npf[LexA]	w+;npf[1]
0	0.72	0.43
0.05	0.55	0.23
0	0	0
0	0	0.25
0.1	0.23	0.12
0.05	0	0
0	0.31	0.08
0	0.33	0.15
0	0	0.08
0.1	0.54	0
0.2	0.12	0
0	0	0.57
0	0.07	0
0	0.67	0.43
0	0	0.71
0	0.41
0	0.15
0	0.02
0.08
