# Supplementary material for: Neuropeptide F regulates courtship in Drosophila through a male-specific neuronal circuit
Source: eLife journal article supplement (doi:10.7554/elife.49574), 2019-08-12
Supplement: supp [file elife-49574-supp-v1.zip › elife_poa_e49574_Figure_1_source_data_1.xlsx]

## Sheet: Percentage initiate courtship
UAS-Shibire/+ @23c	UAS-Shibire/+ @31c	npf-Gal4/+ @23c	npf-Gal4/+ @31c	UAS-Shibire/#25681 @23c	UAS-Shibire/#25681 @31c
16.6667	33.3333	16.6667	16.6667	33.3333	83.3333
0	0	0	0	0	66.6667
16.6667	16.6667	0	0	0	66.6667
0	0	0	0	0	66.6667

## Sheet: Courtship index
UAS-Shibire/+ @23c	UAS-Shibire/+ @31c	npf-Gal4/+ @23c	npf-Gal4/+ @31c	UAS-Shibire/#25681 @23c	UAS-Shibire/#25681 @31c
0.1	0.08	0.08	0.05	0.12	0.89
0	0.07	0	0	0.05	0.11
0	0	0	0	0	0.23
0	0	0	0	0	0.05
0	0	0	0	0	0.62
0	0	0	0	0	0
0	0	0	0	0	0
0	0	0	0	0	0.79
0	0	0	0	0	0.9
0	0	0	0	0	0
0	0	0	0	0	0.12
0	0	0	0	0	0.06
0.05	0.03	0	0	0	0.06
0	0	0	0	0	0.08
0	0	0	0	0	0.08
0	0	0	0	0	0.07
0	0	0	0	0	0
0	0	0	0	0	0
0	0	0	0	0	0.067
0	0	0	0	0	0.25
0	0	0	0	0	0
0	0	0	0	0	0
0	0	0	0	0	0.1
0	0	0	0	0	0.05

## Sheet: MM chaining
UAS-Shibire/+ @23c	UAS-Shibire/+ @31c	npf-Gal4/+ @23c	npf-Gal4/+ @31c	UAS-Shibire/#25681 @23c	UAS-Shibire/#25681 @31c
0	0	0	0	0.05	0.4
0	0.04	0	0	0.025	0.3
0.02	0	0	0	0	0.35
0	0.01	0.01	0.04	0	0.33
0.05	0.02	0	0.03	0.023	0.28
0	0	0.02	0	0.01	0.25
