# Supplementary material for: Neuropeptide F regulates courtship in Drosophila through a male-specific neuronal circuit
Source: eLife journal article supplement (doi:10.7554/elife.49574), 2019-08-12
Supplement: supp [file elife-49574-supp-v1.zip › elife_poa_e49574_Figure_1_source_data_3.xlsx]

## Sheet: Figure 1F
npf[LexA]/npf[1]	npf[GR];npf[LexA]	w+;w1118
0.33	0.1	0
0.2	0.1	0
0.58	0	0
0.6	0.2	0.28
0.29	0	0.42
0.4	0	0
0.3	0.47	0
0.3	0	0
0.7	0	0.08
0.62	0	0
0.3	0.7	0
0	0	0
0	0	0.23
0.8	0	0.13
0.2	0.6	0
0.55	0	0
0.1	0	0.72
0	0	0
0.4	0.73	0
0.5	0	0
0.1	0	0.38
0.9	0	0.21
0.1	0	0
0.12	0	0

## Sheet: Figure 1G
w+;w1118	npf[LexA]/npf[1]	npf[GR];npf[LexA]
0.5	0.6	0.45
0.44	0.53	0.3
0	0.57	0.55
0.47	0.7	0.1
0.2	0.8	0.05
0.3	0.4	0
0	0.77	0
0.5	0.2	0
0.1	0.69	0
0	0.23	0
0	0.4	0
0.05	0.75	0.43

## Sheet: Figure 1H
npf[LexA]/npf[1]	w+;w1118	npf[GR];npf[LexA]
0.27	0	0
0.15	0.05	0
0.55	0	0
0.6	0	0
0.22	0.1	0
0.56	0.05	0
0.08	0	0
0.05	0	0.15
0.02	0	0
0.5	0.1	0
0.55	0.2	0
0.61	0	0
0.18	0	0
0.25	0	0.58
0.14	0	0
0.1	0	0
0.23	0	0
0.26	0	0.42
0.18	0.08	0
		0
		0.07
		0.1
		0
		0

## Sheet: Figure 1I
w+;w1118	npf[LexA]/npf[1]	npf[GR];npf[LexA]
0.68	0.81	0.9
0.82	0.9	0.75
1	0.85	0.8
1	0.74	1
1	1	1
1	1	1
1	1	1
1	1	1
1	1	1
1	1	1
1	1	1
1	1	1

## Sheet: Figure 1J
npf[LexA]/npf[1]	w+;w1118	npf[GR];npf[LexA]
0.8	0	0
0.62	0.85	0.85
0.44	0.2	0
0.59	0	0.57
0.29	0	0
0.3	0.28	0
0.2	0.1	0.73
0.35	0.32	0
0.5	0	0
0.57	0.2	0
0.4	0.17	0
0.18	0	0.32
0.36	0.1	0
0	0	0.55
0.2	0.1	0
0.3	0	0
0.1	0	0.08
0.3	0	0
0.1	0	0
0	0	0.02
0.9	0	0
0.83	0	0
0.6	0	0
0.61	0.5	0.35

## Sheet: Figure 1K
w+;w1118	npf[LexA]/npf[1]	npf[GR];npf[LexA]
0.3	0.1	0
0.1	0.54	0.05
0.01	0	0.08
0	0.3	0
0	0	0
0	0	0
0	0	0.55
0	0.46	0
0	0	0
0	0	0
0.25	0.25	0
0	0	0
0.05	0.43	0
0	0.5	0
0.02	0.7	0
0.05	0.25	0
0	0.6	0.1
0.02	0.23	0.17
0	0.1	0.02
0	0.13	0.05
		0
		0
