# Supplementary material for: Neuropeptide F regulates courtship in Drosophila through a male-specific neuronal circuit
Source: eLife journal article supplement (doi:10.7554/elife.49574), 2019-08-12
Supplement: supp [file elife-49574-supp-v1.zip › elife_poa_e49574_Figure_4_source_data_1.xlsx]

## Sheet: Sheet1
npfG4 fruFLP-23	npfG4 fruFLP-31	UAS_stop_Shi-23	UAS_stop_Shi-31	UAS_Shi_stop-23	UAS_Shi_stop-31	G4 FLP UAS_Shi_stop-23	G4 FLP UAS_Shi_stop-31	G4 UAS_stop_Shi-23	G4 UAS_stop_Shi-31	G4 FLP UAS_stop_Shi-23	G4 FLP UAS_stop_Shi-31
0	0	0.00222222	0.00944444	0	0.00888889	0	0.124444	0.00111111	0	0	0.973333
0	0	0.0183333	0	0	0.00888889	0	0	0.0216667	0	0.124444	0.972222
0.162778	0	0.00277778	0.005	0	0.00166667	0	0.457222	0.245	0.150556	0	0.992778
0.0116667	0	0.00111111	0	0	0	0.114444	0.0905556	0	0	0.457222	0.01
0	0	0.0311111	0	0.00166667	0	0.518333	0.0427778	0.00444444	0	0.0905556	0.0655556
0	0.0111111	0	0	0.06	0.0688889	0.235	0.00611111	0.610556	0.970556	0.0427778	0.960556
0.000555556	0.357778	0.00388889	0	0.301667	0	0	0.0422222	0.02	0	0.00944444	0.0411111
0	0.0933333	0.0361111	0.767778	0	0	0	0.0411111	0.00111111	0.0188889	0.00444444	0
0	0.00222222	0.0461111	0.025	0.0144444	0	0	0	0		0	0.00277778
0.131667	0	0.973333	0.335	0.000555556	0.00388889	0.00333333	0	0.02		0.0344444	0
0.343889		0.015	0.0266667	0.00777778	0.015	0.00222222	0	0.119444		0.0411111	0.0211111
0		0		0	0.00111111	0.183333	0			0.0461111	0.0766667
0.000555556		0		0	0.1	0.282222	0.00555556			0.0472222	0.0955556
0.00611111		0		0	0		0			0.222222	0.71
0		0.363333		0.0361111	0		0.00277778			0	0.910555
0.0469444				0	0.00166667		0.0366667			0	0.346111
0.100542				0	0		0.108889			0.755556	0.994444
0.14				0	0		0.368889			0.867778	0.0188889
0.026871					0					0.0344444	0.0544444
					0					0.133889	0.993333
					0.276667					0	0.873889
					0.518333					0	0.297778
					0					0	0.00944444
					0.489444					0	0.752222
