# Supplementary material for: Neuropeptide F regulates courtship in Drosophila through a male-specific neuronal circuit
Source: eLife journal article supplement (doi:10.7554/elife.49574), 2019-08-12
Supplement: supp [file elife-49574-supp-v1.zip › elife_poa_e49574_Figure_4_source_data_3.xlsx]

## Sheet: Sheet1
npfG4 fruFLP-23	npfG4 fruFLP-29	UAS>stop>trpA1-23	UAS>stop>trpA1-29	npfG4 UAS>stop>trpA1-23	npfG4 UAS>stop>trpA1-29	G4 FLP UAS>stop>trpA1-23	G4 FLP UAS>stop>trpA1-29
0.75	0	0	0	0.136667	0.0816667	0.165	0.821667
0	0.113333	0.581667	0	0.0216667	0.288333	0.0966667	0
0.788333	0.988333	0.00666667	0	0.988333	0.00833333	0	1
0.155	1	0	0.988333	0	0.01	0.05	0
0.458333	0.0116667	0.0633333	0	0.623333	0.921667	0.095	0
0.168333	0.733333	0.308333	0.0666667	0.963333	0.00333333	0.88	0
0.0816667	0.511667	0.205	0		0.566667	0	0
0	0	0.125	0		0.813333	0.87	0
0.015	0.781667	0.09	0		1	0	0.0566667
1	0.246667	0.726667	0.0516667			0.0683333	0.753333
0.361667	1	1	0.01			1	0.705
0	0.085	1	0.616667			0.883333	0
0.128333	0	1	0.283333			1	0.985
0.638333	0.666667	0.783333	0.97			0.966667	0
0.005	0.348333	1	1			0.913333	0
0.025	0.00166667	0.06	0.87			1	0.278333
0.015	0.00166667	0.00666667	0.975			0.756667	0.648333
0.07	0.00166667	0.158333	1			1	0
0.025	0.653333	0	1			0.645	0.708333
0.631667		0.08	0.215			1	0.485
		0	0.86			0.77	0
		0.856667	0			1	0.00666667
		0.248333	0.223333			0.74	0.443333
			0.0116667			0.513333	0
						0.0183333	0.193333
						0.216667
						0
