# Supplementary material for: Neuropeptide F regulates courtship in Drosophila through a male-specific neuronal circuit
Source: eLife journal article supplement (doi:10.7554/elife.49574), 2019-08-12
Supplement: supp [file elife-49574-supp-v1.zip › elife_poa_e49574_Figure_4_source_data_5.xlsx]

## Sheet: Sheet1
UAS-npf-RNAi/+	elav-G4/+	elav-G4/UAS-npf-RNAi	fru-G4/+	fru-G4/UAS-npf-RNAi	npf-G4/+	npf-G4/UAS-npf-RNAi	tub>stop>Gal80/+;fruFLP/+	tub>stop>Gal80/npfG4;fruFLP/IR	tub>Gal80>stop/+;fruFLP/+	tub>Gal80>stop/npfG4;fruFLP/IR
0.05	0.05	0.48	0.1	0.41	0.1	0.4	0.033	0.04	0.05	0.57
0	0	0.39	0.04	0.35	0	0.35	0.12	0.02	0.023	0.33
0	0	0.53	0.02	0.4	0	0.44	0	0.012	0.01	0.32
0	0	0.3	0	0.17	0	0.18	0	0	0.01	0.15
0	0	0.18	0	0.23	0	0.22	0	0	0	0
0	0	0.05	0	0.1	0	0.19	0	0	0	0.21
0	0	0.1	0	0.05	0	0.37	0	0	0	0.43
0	0	0	0	0.03	0	0.05	0		0	0.13
0.1	0	0.22	0	0.27	0	0	0		0
0	0	0.31	0	0.2	0.04	0.3	0		0
0	0	0.18	0	0.33	0	0.14	0		0
0.02	0.08	0.05	0.08	0.08	0.17	0.24			0
