# Supplementary material for: Neuropeptide F regulates courtship in Drosophila through a male-specific neuronal circuit
Source: eLife journal article supplement (doi:10.7554/elife.49574), 2019-08-12
Supplement: supp [file elife-49574-supp-v1.zip › elife_poa_e49574_Figure_6_source_data_1.xlsx]

## Sheet: Sheet1
+>P2X2	R71G01-LexA>P2X2
7.7512	124.82
3.13549	26.1156
2.15733	270.009
27.2104	299.014
49.5862	87.0571
3.48267	194.257
5.54943	155.137
-2.68174	59.5918
7.70538	234.232
2.97025	124.844
7.51684	23.9746
6.28363	9.68719
	41.087
	35.7128
	99.9238
