# Supplementary material for: Neuropeptide F regulates courtship in Drosophila through a male-specific neuronal circuit
Source: eLife journal article supplement (doi:10.7554/elife.49574), 2019-08-12
Supplement: supp [file elife-49574-supp-v1.zip › elife_poa_e49574_Figure_6_source_data_3.xlsx]

## Sheet: Sheet1
+>P2X2	sp-P1-Gal4>P2X2
-37.2058	190.197
-16.1002	213.359
-6.11688	275.048
-7.05447	284.135
3.12701	323.135
-8.09397	13.2023
-5.04367	22.8633
-6.67445	16.6006
17.9082	-1.85733
-8.07989	42.5035
	1.40932
	-4.01192
