# Supplementary material for: Neuropeptide F regulates courtship in Drosophila through a male-specific neuronal circuit
Source: eLife journal article supplement (doi:10.7554/elife.49574), 2019-08-12
Supplement: supp [file elife-49574-supp-v1.zip › elife_poa_e49574_Figure_7_source_data_1.xlsx]

## Sheet: Percentage initiate courtship
npfG4/Shi 23c	npfG4/Shi 31c	P1-G4/Shi 23c	P1-G4/Shi 31c	npf+P1/Shi 23c	npf+P1/Shi 31c
33.3333	83.3333	16.6667	0	16.6667	50
0	66.6667	0	16.6667	16.6667	0
0	66.6667	16.6667	0	0	0
0	66.6667	16.6667	33.3333	33.3333	16.6667

## Sheet: Courtship index
npfG4/Shi 23c	npfG4/Shi 31c	P1-G4/Shi 23c	P1-G4/Shi 31c	npf+P1/Shi 23c	npf+P1/Shi 31c
0.12	0.89	0	0	0	0
0.05	0.11	0	0	0	0.05
0	0.23	0	0	0	0.02
0	0.05	0	0	0.25	0
0	0.62	0.23	0	0	0.1
0	0	0	0	0	0
0	0	0	0	0	0
0	0.79	0	0	0	0
0	0.9	0	0.3	0	0
0	0	0	0	0.08	0
0	0.12	0	0	0	0
0	0.06	0	0	0	0
0	0.06	0	0	0	0
0	0.08	0	0	0	0
0	0.08	0	0	0	0
0	0.07	0	0	0	0
0	0	0.05	0	0	0
0	0	0	0	0	0
0	0.0666667	0	0.25	0	0
0	0.25	0	0	0	0
0	0	0	0	0	0.07
0	0	0	0	0.05	0
0	0.1	0.18	0	0.02	0
0	0.05	0	0.1	0	0

## Sheet: MM chaining
npf-GAL4/UAS-Shibire 23c	npf-GAL4/UAS-Shibire 31c	P1-Gal4/UAS-Shibire 23c	P1-Gal4/UAS-Shibire 31c	npf+P1 G4/Shibire 23c	npf+P1 G4/Shibire 31c
0.05	0.4	0	0	0	0
0.025	0.3	0	0.02	0	0
0	0.35	0	0	0	0
0	0.33	0	0.05	0	0
0.023	0.28	0.02	0	0	0.02
0.01	0.25	0.07	0.1	0.1	0.04
