# Supplementary material for: Neuropeptide F regulates courtship in Drosophila through a male-specific neuronal circuit
Source: eLife journal article supplement (doi:10.7554/elife.49574), 2019-08-12
Supplement: supp [file elife-49574-supp-v1.zip › elife_poa_e49574_Figure_7_source_data_3.xlsx]

## Sheet: npfr mutant
WT	npfr[LexA]	npfr[LexA]/[c01896]
0.05	0.7	0.1
0	0.1	0.15
0	0.26	0
0	0.25	0.34
0	0.3	0
0.1	0.15	0.43
0	0.4	0.08
0	0.34	0
0.08	0.2	0.17
0	0.28	0.23
0	0.23	0.3
0.2	0.25	0.19
		0.47
		0.1
		0.13
		0
		0.21
		0.72
		0.22
		0
		0.3
		0.56
		0.16
		0.28

## Sheet: npfr RNAi
npfr-IR	elav/npfr-IR	P1/npfr-IR
0	0	0
0	0	0
0	0	0
0	0	0
0.17	0.61	0
0	0.53	0
0	0.4	0.02
0	0.36	0
0	0.38	0
0	0.22	0
0	0.14	0.02
0.12	0.34	0
0	0.21	0
0	0.08	0
0	0.13	0
0	0.07	0
0.07	0.05	0
0	0.15	0
0	0.15	0.13
0	0.2	0
0	0	0.05
		0
		0
