# Supplementary material for: Neuropeptide F regulates courtship in Drosophila through a male-specific neuronal circuit
Source: eLife journal article supplement (doi:10.7554/elife.49574), 2019-08-12
Supplement: supp [file elife-49574-supp-v1.zip › elife_poa_e49574_Figure_8_source_data_1.xlsx]

## Sheet: Sheet1
+>P2X2	npfrLexA>P2X2
7.84909	175.807
5.80095	107.851
3.06107	82.037
-1.34004	58.98
-1.83167	152.892
13.407	197.077
18.9911	182.833
11.4012	234
12.141	178.788
11.2126	156.984
6.19302	157.462
14.5808	118.744
5.26439	127.726
0.782477	106.231
0.261042	87.359
6.43514	224.008
8.26118	222.191
3.13136	207.238
3.6626	107.688
-0.268965	167.218
5.31546	91.921
11.8085	145.252
11.1633
10.2371
5.93227
