# Supplementary figures and images for: Neuropeptide F regulates courtship in Drosophila through a male-specific neuronal circuit
Source: eLife journal article supplement (doi:10.7554/elife.49574), 2019-08-12

## Figure 1—figure supplement 1

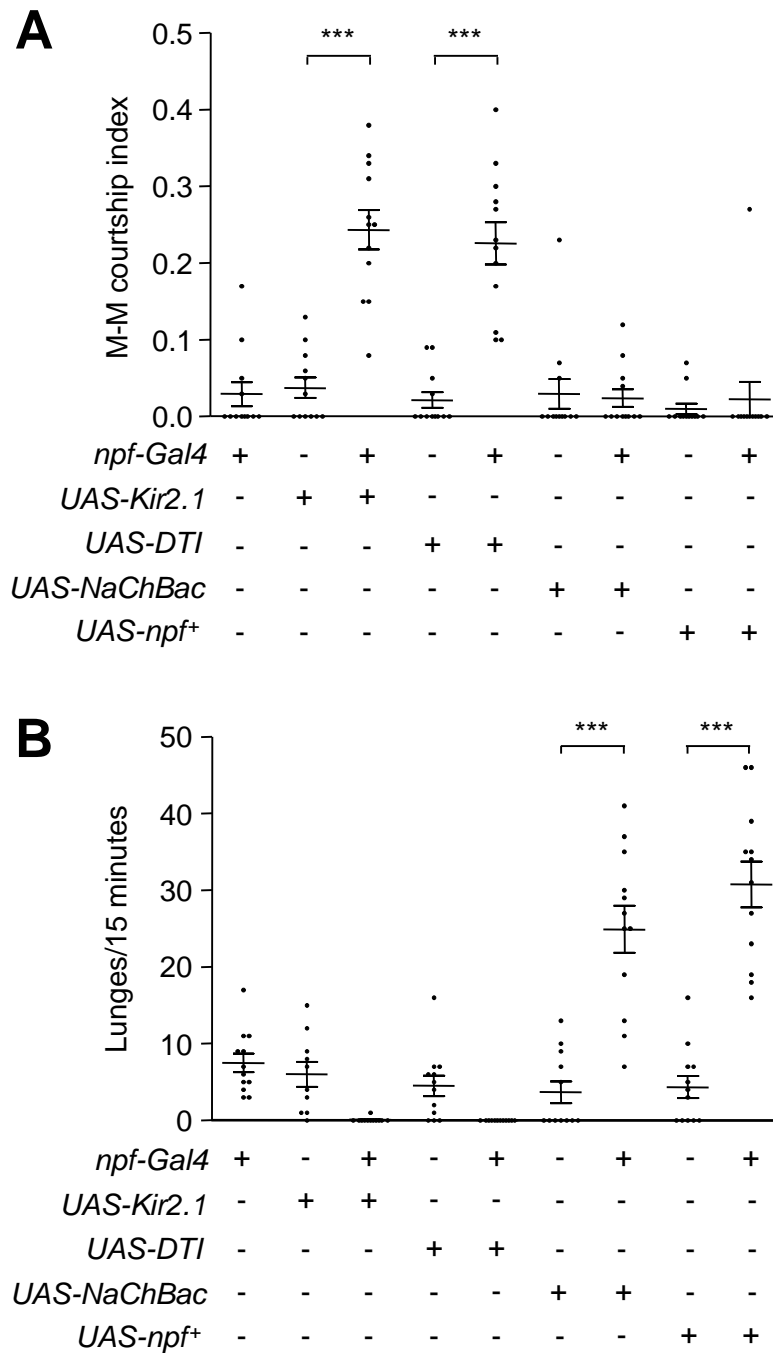

Supplement: supp [file elife-49574-supp-v1.zip]

# Figure 5—figure supplement 3

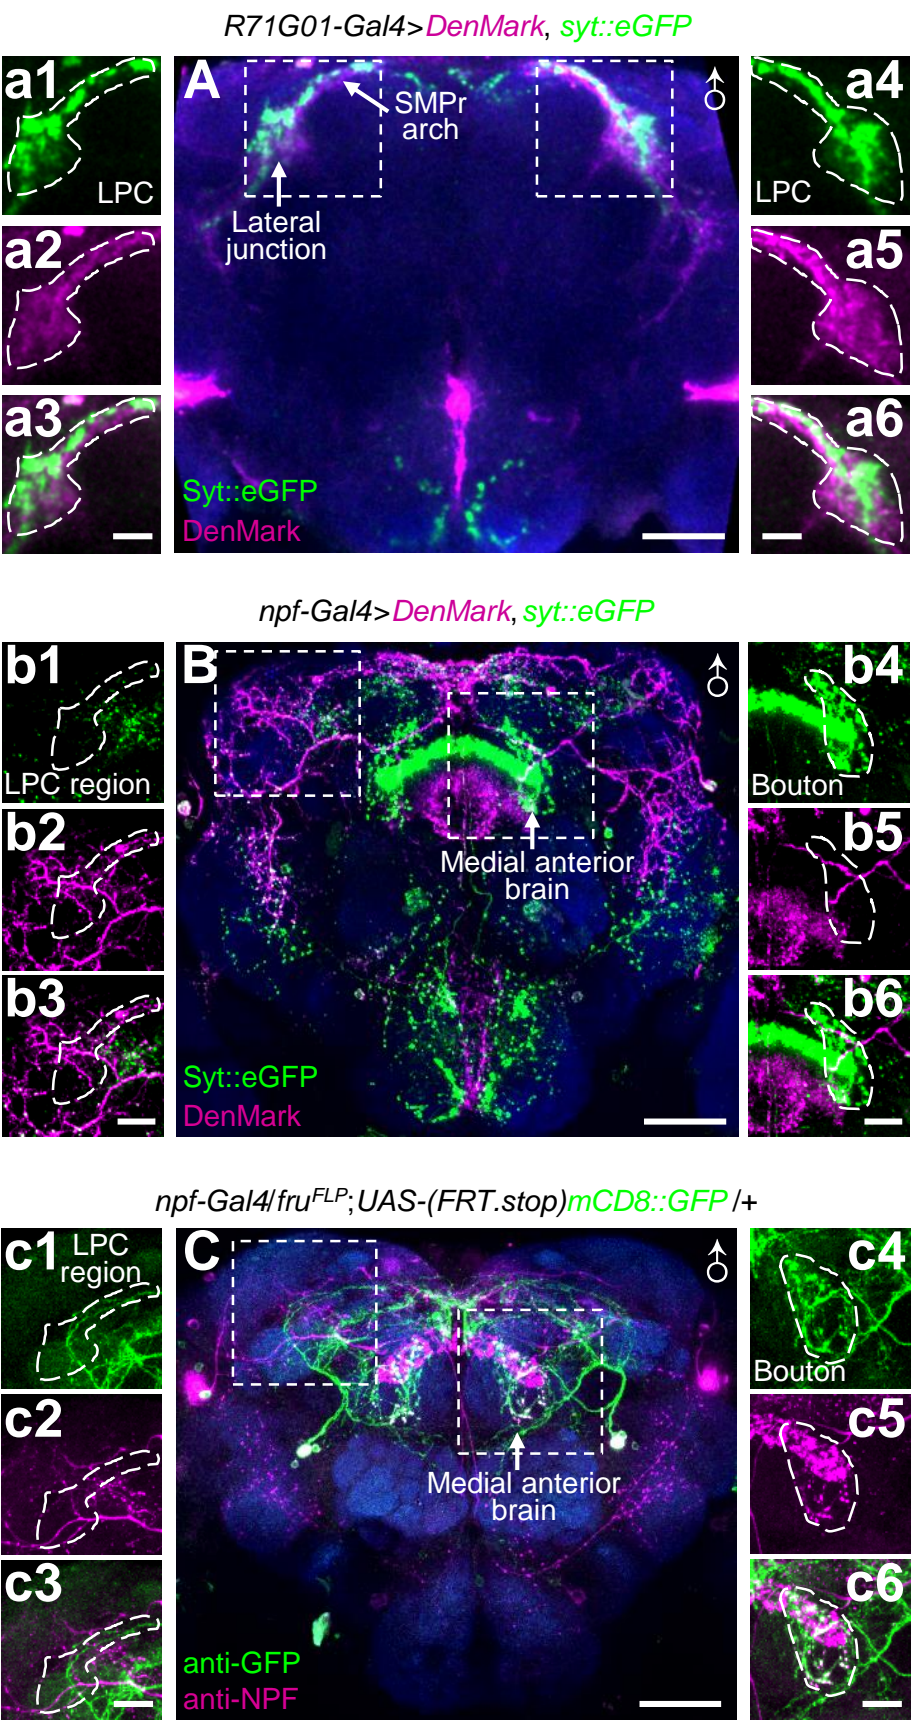

Supplement: supp [file elife-49574-supp-v1.zip]

Figure 5—figure supplement 2

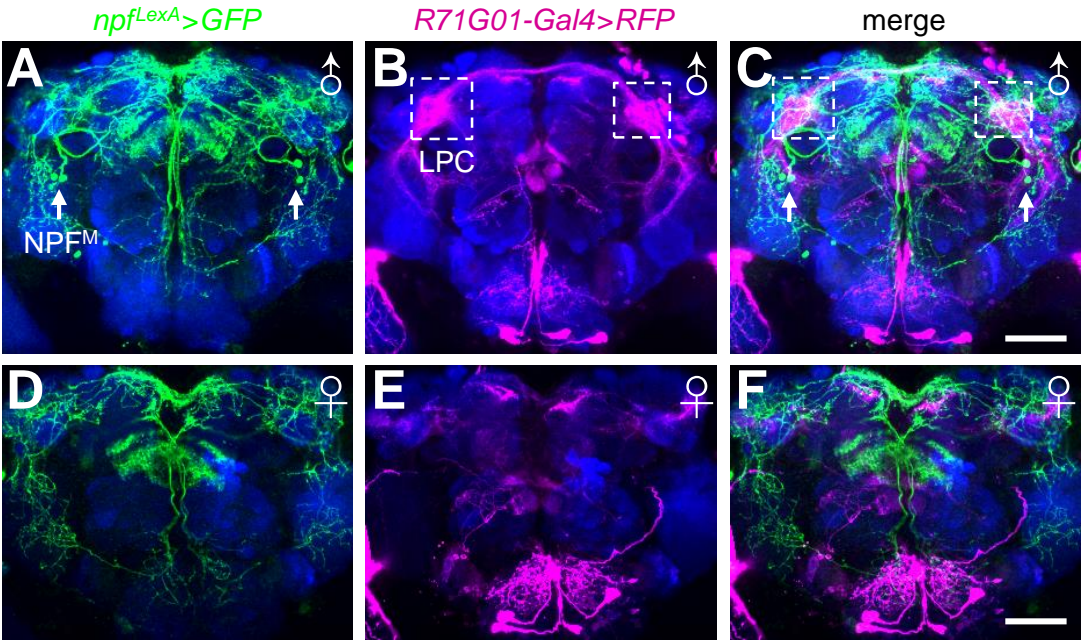

Supplement: supp [file elife-49574-supp-v1.zip]

# Figure 1—figure supplement 2

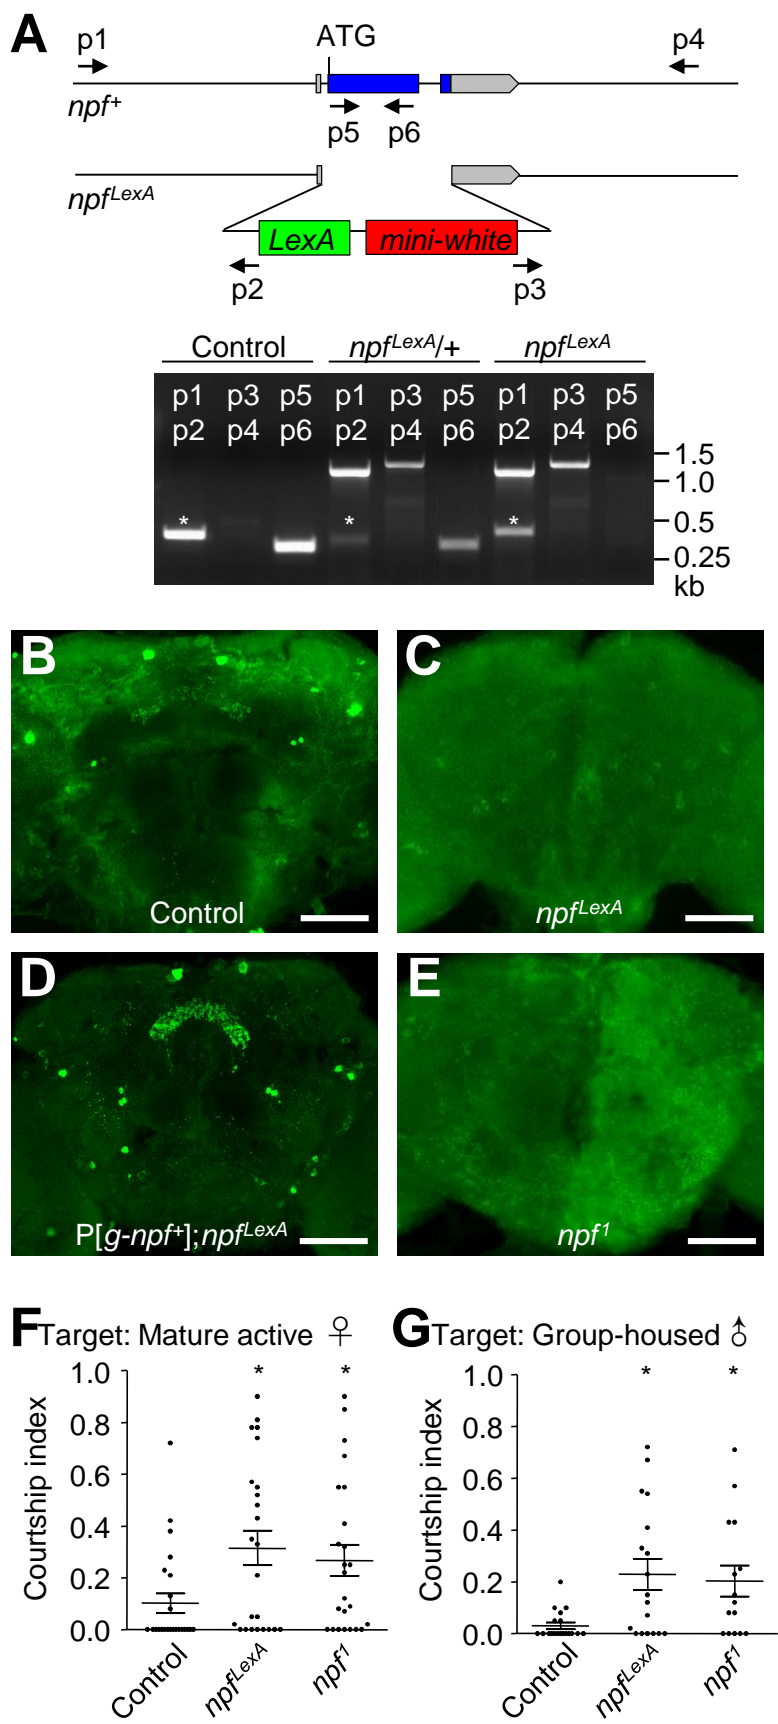

Supplement: supp [file elife-49574-supp-v1.zip]

Figure 1—figure supplement 3

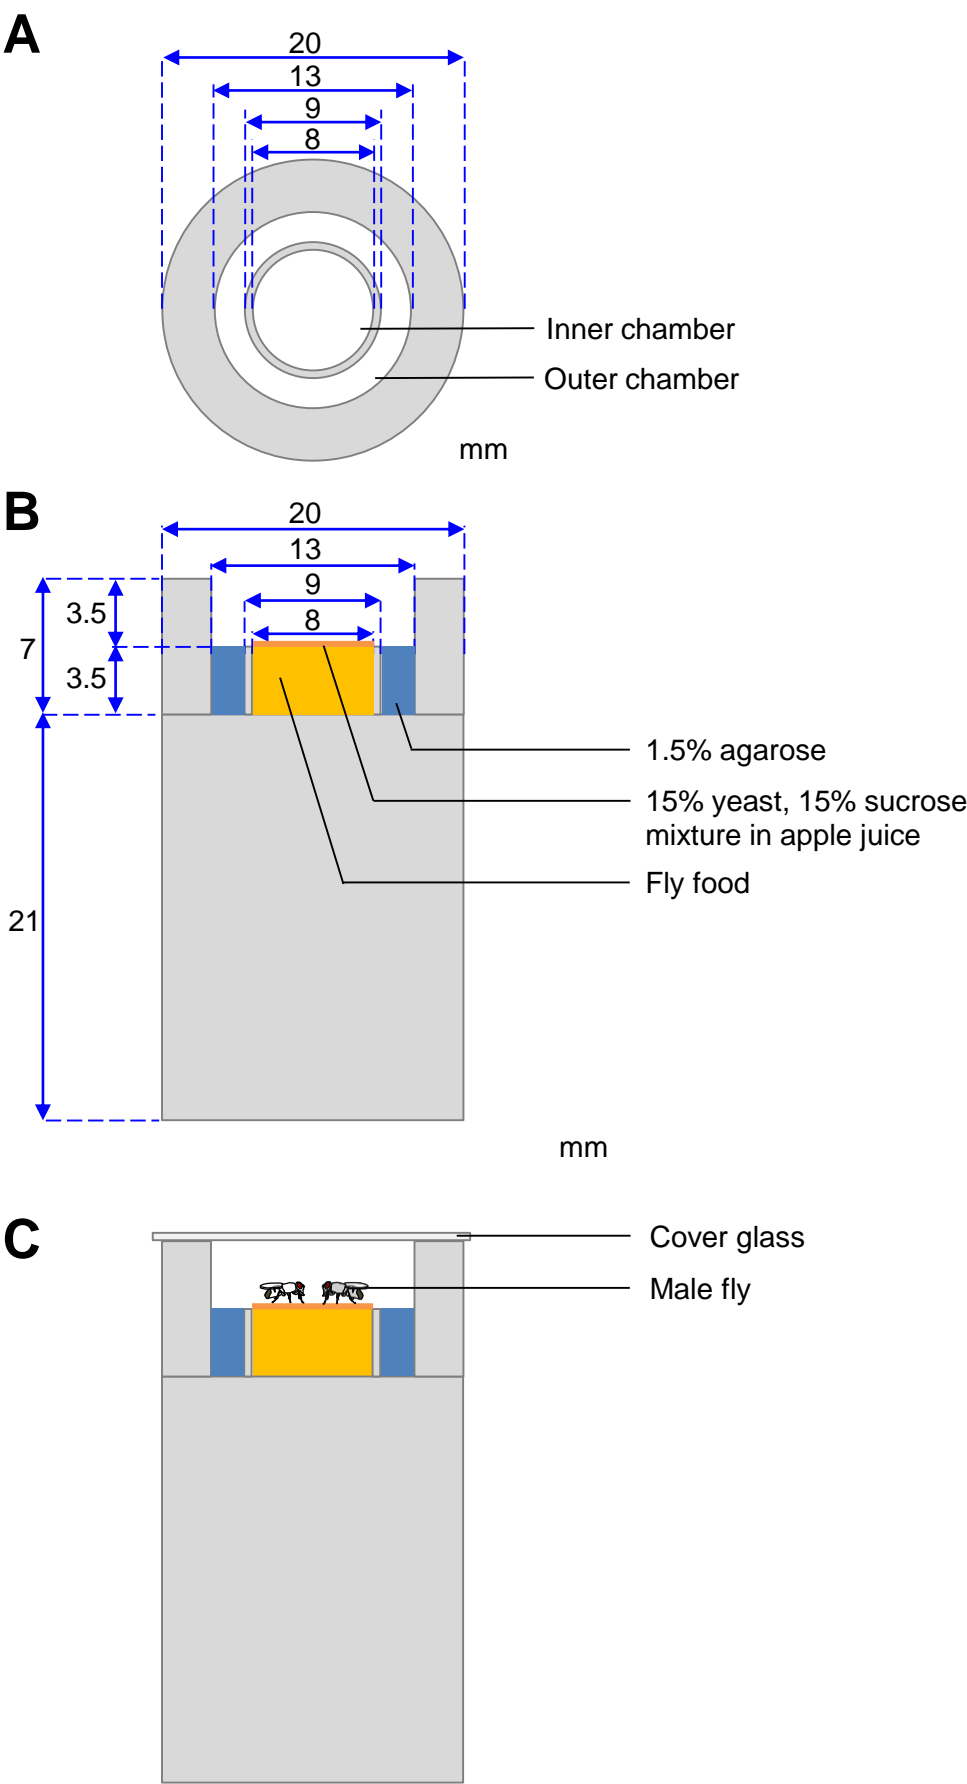

Supplement: supp [file elife-49574-supp-v1.zip]

Figure 7—figure supplement 1

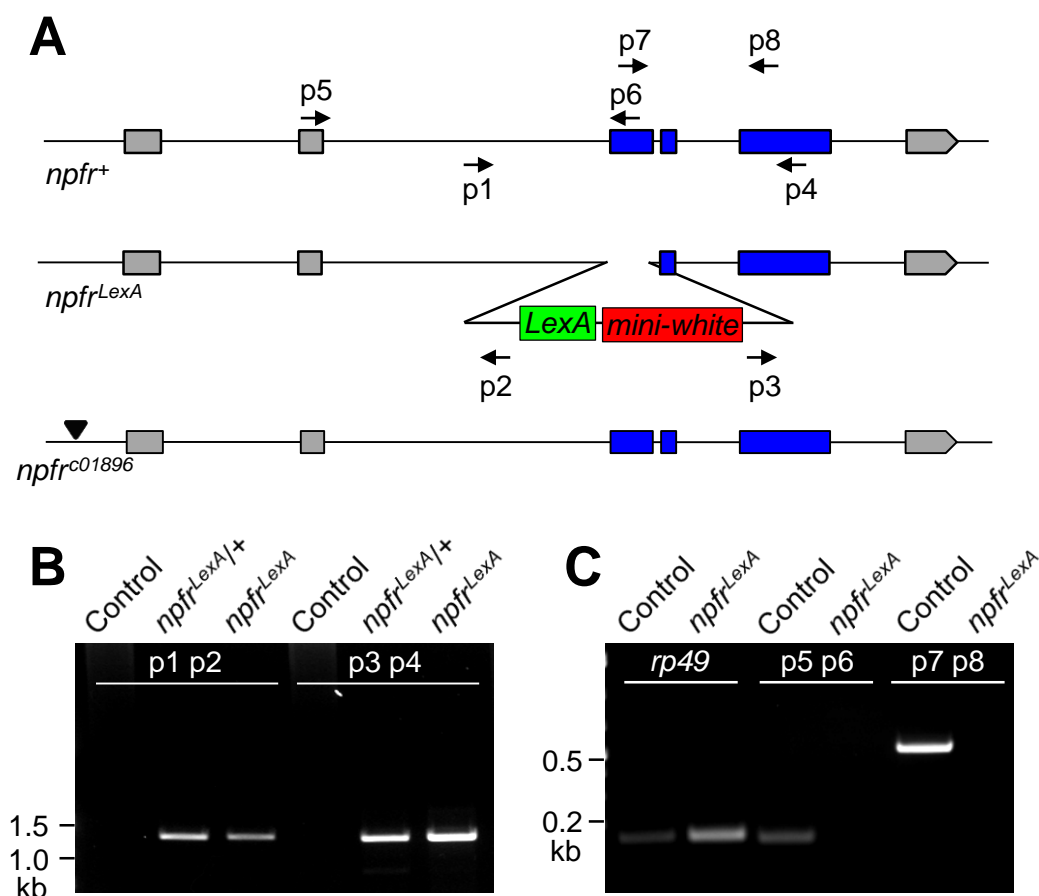

Supplement: supp [file elife-49574-supp-v1.zip]

Figure 2—figure supplement 1

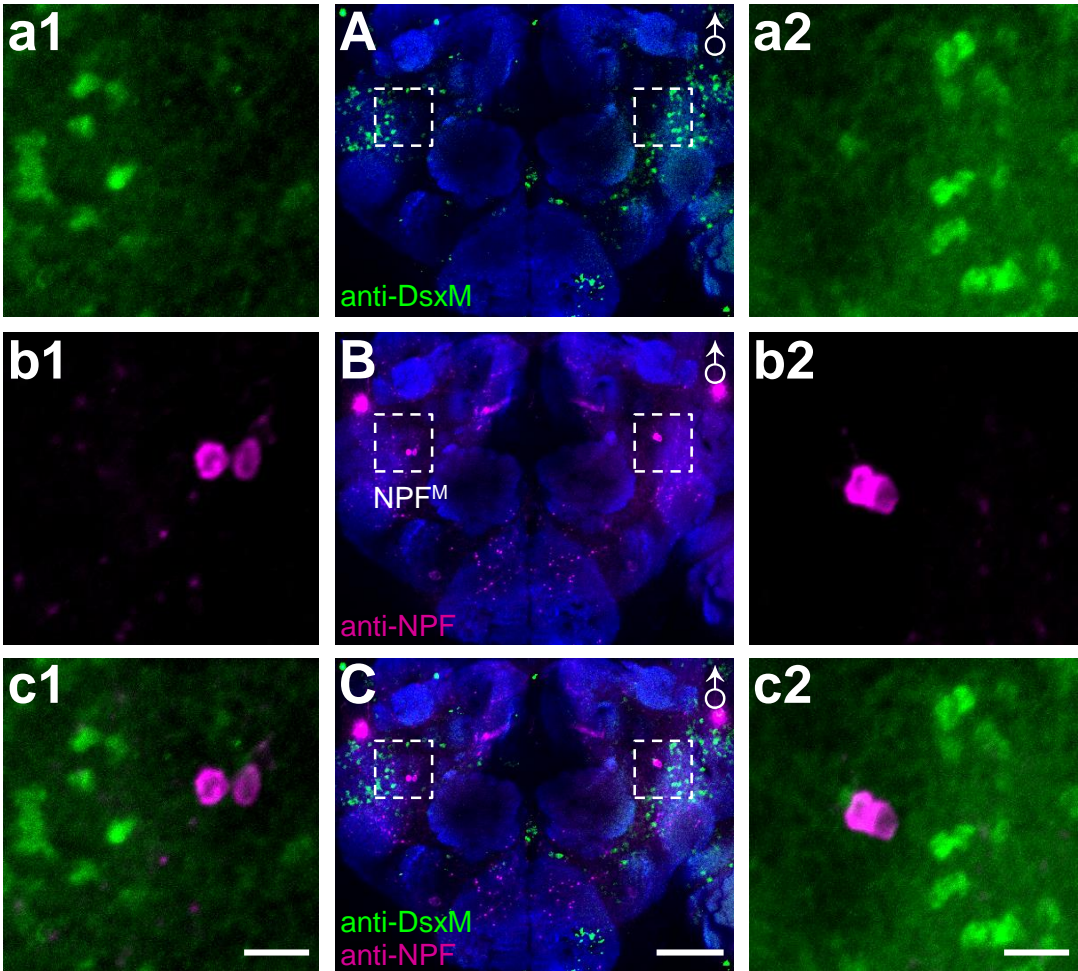

Supplement: supp [file elife-49574-supp-v1.zip]

# Figure 5—figure supplement 1

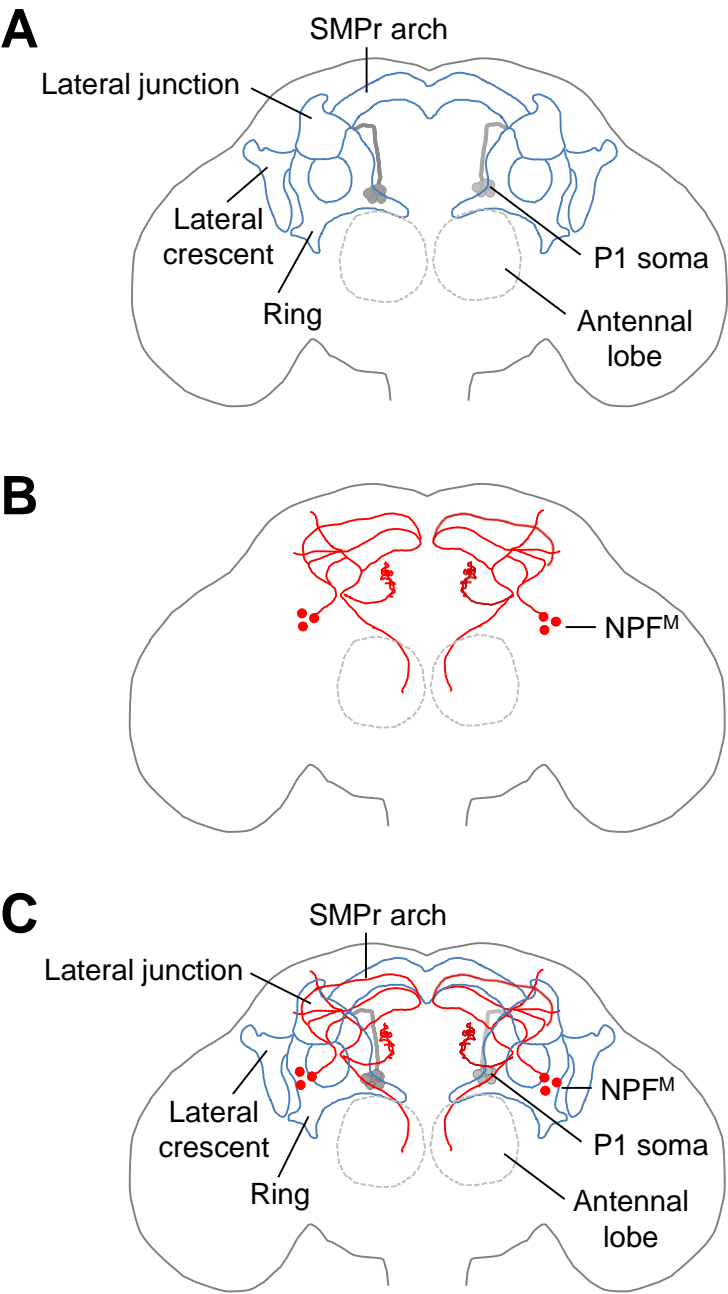

Supplement: supp [file elife-49574-supp-v1.zip › elife_poa_e49574_Figure_5_figure_supplement_1.pdf]

Figure 6—figure supplement 1

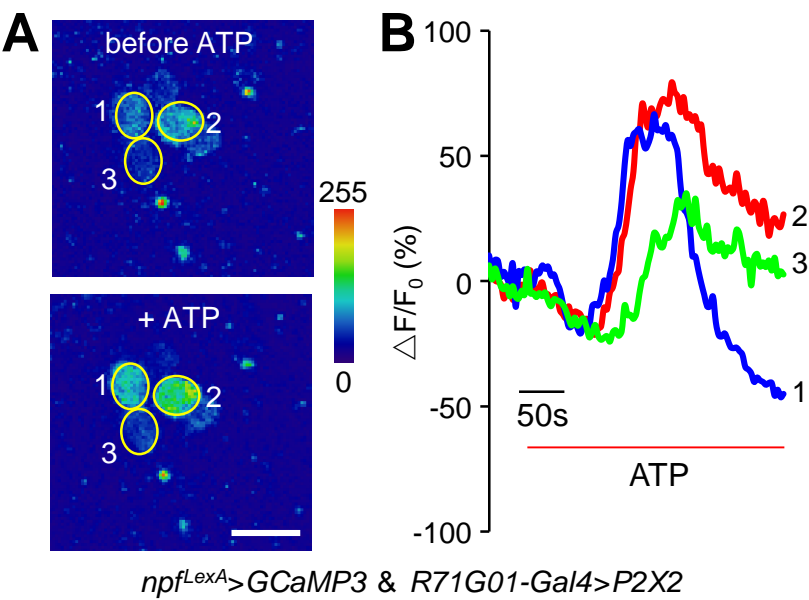

Supplement: supp [file elife-49574-supp-v1.zip › elife_poa_e49574_Figure_6_figure_supplement_1.pdf]
